# Supplementary material
Source: PubMed Central journal article supplement (PMC8796860)
Supplement: web_material_kwab182.pdf [file web_material_kwab182.pdf]

## Is Alcohol Consumption Associated with Early Menopause Risk?

Joshua R. Freeman, Brian W. Whitcomb, Alexandra C. Purdue-Smithe, JoAnn E. Manson, Christine R. Langton, Susan E. Hankinson, Bernard A. Rosner, and Elizabeth R. Bertone-Johnson

### Table of Contents

|                                                                                                                                                                           |   |
|---------------------------------------------------------------------------------------------------------------------------------------------------------------------------|---|
| <b>Web Table 1.</b> Age-adjusted characteristics of premenopausal women according to alcohol intake at baseline: Nurses' Health Study II (1989-2011) <sup>a,b</sup> ..... | 2 |
|---------------------------------------------------------------------------------------------------------------------------------------------------------------------------|---|

**Web Table 1:** Age-adjusted characteristics of premenopausal women according to alcohol intake at baseline: Nurses' Health Study II (1989-2011)<sup>a,b</sup>

|                                                       | Alcohol intake (g/day)    |                       |                       |                      |                      |                |
|-------------------------------------------------------|---------------------------|-----------------------|-----------------------|----------------------|----------------------|----------------|
|                                                       | Non-drinker<br>(n=40,430) | 0.1-4.9<br>(n=45,575) | 5.0-9.9<br>(n=11,671) | 10-14.9<br>(n=6,950) | 15-29.9<br>(n=2,426) | ≥30<br>(n=765) |
|                                                       | mean (SE)                 | mean (SE)             | mean (SE)             | mean (SE)            | mean (SE)            | mean (SE)      |
| Age (years)                                           | 34.3 (0.02)               | 34.0 (0.02)           | 33.9 (0.04)           | 34.3 (0.06)          | 34.3 (0.09)          | 35.1 (0.17)    |
| Body mass index (kg/m <sup>2</sup> )                  | 24.7 (0.02)               | 23.9 (0.02)           | 23.0 (0.05)           | 23.0 (0.06)          | 23.1 (0.10)          | 24.0 (0.18)    |
| Body mass index at age 18 years (kg/m <sup>2</sup> )  | 21.4 (0.02)               | 21.3 (0.02)           | 21.0 (0.03)           | 21.0 (0.04)          | 21.0 (0.07)          | 21.2 (0.12)    |
| Age at menarche (years)                               | 12.4 (0.01)               | 12.4 (0.01)           | 12.5 (0.01)           | 12.5 (0.02)          | 12.5 (0.03)          | 12.5 (0.05)    |
| Pack-years of smoking <sup>c</sup>                    | 11.7 (0.07)               | 10.6 (0.06)           | 10.4 (0.10)           | 11.3 (0.12)          | 11.6 (0.19)          | 14.1 (0.31)    |
| Parity (full term pregnancies) <sup>d</sup>           | 2.13 (0.01)               | 2.05 (0.01)           | 1.98 (0.01)           | 1.96 (0.01)          | 1.87 (0.03)          | 1.88 (0.04)    |
| Breastfeeding (months) <sup>d</sup>                   | 15.6 (0.1)                | 14.0 (0.1)            | 13.4 (0.2)            | 13.0 (0.3)           | 12.1 (0.5)           | 10.6 (0.9)     |
| Oral contraceptive use duration (months) <sup>e</sup> | 45.6 (0.2)                | 51.7 (0.2)            | 55.2 (0.4)            | 56.9 (0.5)           | 58.5 (0.8)           | 62.6 (1.5)     |
|                                                       | %                         | %                     | %                     | %                    | %                    | %              |
| White race                                            | 91.40%                    | 95.10%                | 96.40%                | 96.80%               | 96.20%               | 96.50%         |
| Non-Hispanic ethnicity                                | 98.10%                    | 98.10%                | 98.60%                | 98.40%               | 98.20%               | 98.90%         |
| Smoking status                                        |                           |                       |                       |                      |                      |                |
| Past                                                  | 16.60%                    | 23.90%                | 31.40%                | 34.90%               | 36.50%               | 30.50%         |
| Current                                               | 9.50%                     | 12.10%                | 16.40%                | 21.90%               | 24.80%               | 43.70%         |
| Parous                                                | 76.90%                    | 70.50%                | 62.10%                | 57.80%               | 49.90%               | 54.10%         |
| Oral contraceptive use                                |                           |                       |                       |                      |                      |                |
| Past                                                  | 69.50%                    | 71.40%                | 72.30%                | 71.30%               | 72.00%               | 72.70%         |
| Current                                               | 9.30%                     | 12.90%                | 15.70%                | 16.10%               | 18.10%               | 15.80%         |

<sup>a</sup>All characteristics were calculated using generalized linear models adjusting for the age of participants in 1989. <sup>b</sup>All values presented as means and standard errors or percentage (%). <sup>c</sup>Values among ever smokers only. <sup>d</sup>Values among parous women only. <sup>e</sup>Values among oral contraceptive users only.
